# Supplementary material
Source: PubMed Central journal article supplement (PMC7831383)
Supplement: NIHMS1663170-supplement-Supporting_Information.pdf [file NIHMS1663170-supplement-Supporting_Information.pdf]

## **Supporting Information: Photochemical Generation and Reactivity of the 5,6-Dihydrouridin-6-yl Radical.**

*Cory A. Newman, Marino J. E. Resendiz, Jonathan T. Szczepanski, and Marc M. Greenberg\**

Department of Chemistry, Johns Hopkins University, 3400 N. Charles St., Baltimore, MD 21218

mgreenberg@jhu.edu

### **Contents:**

1. General experimental methods (S2)
2. **Supporting Information Table 1.** Response Factors and retention times using dU as internal standard. (S2)
3. **Supporting Information Figure 1.**  $^1\text{H}$  (top) and  $^{13}\text{C}$  (bottom) NMR spectra of **2a**. (S3)
4. **Supporting Information Figure 2.**  $^1\text{H}$  (top) and  $^{13}\text{C}$  (bottom) NMR spectra of **2b**. (S4)
5. **Supporting Information Figure 3.**  $^1\text{H}$  (top) and  $^{13}\text{C}$  (bottom) NMR spectra of **4**. (S5)
6. **Supporting Information Figure 4.**  $^1\text{H}$  (top) and  $^{13}\text{C}$  (bottom) NMR spectra of less polar bromohydrin. (S6)
7. **Supporting Information Figure 5.**  $^1\text{H}$  (top) and  $^{13}\text{C}$  (bottom) NMR spectra of more polar bromohydrin. (S7)
8. **Supporting Information Figure 6.**  $^1\text{H}$  (top) and  $^{13}\text{C}$  (bottom) NMR spectra of **6**. (S8)
9. **Supporting Information Figure 7.**  $^1\text{H}$  NMR spectra of **7**. (S9)

**General Methods.** Benzoyl chloride,  $\beta$ -mercaptoethanol, and pivaloyl chloride were distilled prior to use. DMF was distilled from  $\text{CaH}_2$ .  $\text{CH}_3\text{CN}$  was passed through anhydrous  $\text{CuSO}_4$  prior to distillation from  $\text{CaH}_2$ . All photolyses were carried out in Pyrex tubes using a Rayonet photoreactor fitted with 16 lamps having an output maximum at 350 nm. All anaerobic photolyses were carried out in sealed Pyrex tubes, which were degassed and sealed using standard freeze-pump-thaw degassing techniques (three cycles, three minutes each).

HPLC samples were analyzed with a Microsorb-MV C18 5  $\mu\text{m}$  column (4.6  $\times$  250 mm). Samples were detected at 230 nm using one of the following three gradients. Hold for 1 min. (100% water); then ramp to 20%  $\text{CH}_3\text{CN}$  linearly in 29 min; then ramp to 40%  $\text{CH}_3\text{CN}$  linearly in 5 min; hold at 40%  $\text{CH}_3\text{CN}$ . Dihydrouridine was prepared as previously described.<sup>1</sup>

**Determination of response factors.** Response factors for **2b**, **4**, **5** and **6** were calculated versus 2'-deoxyuridine (dU) as an internal standard. Response factors were calculated using the following formula:  $([X]/[S])=R_f(A(X)/A(S))$ , where  $[X]$  is the concentration of the compound of interest and  $[S]$  is the concentration of the internal standard.  $A(X)$  and  $A(S)$  are the areas under the peaks corresponding to the compound of interest and the internal standard, respectively (Table 1).

**Supporting Information Table 1.** Response Factors and retention times using dU as internal standard.

| Compound  | Retention time (min) | Response Factor |
|-----------|----------------------|-----------------|
| <b>2b</b> | 42                   | 4.36            |
| <b>4</b>  | 38                   | 3.80            |
| <b>5</b>  | 37                   | 5.67            |
| <b>6</b>  | 35 and 36            | 4.03            |
| <b>7</b>  | 39                   | 0.20            |

(1) Johnson, D. C. I.; Widlanski, T. S. *Org. Lett.* **2004**, *6*, 4643-4646.

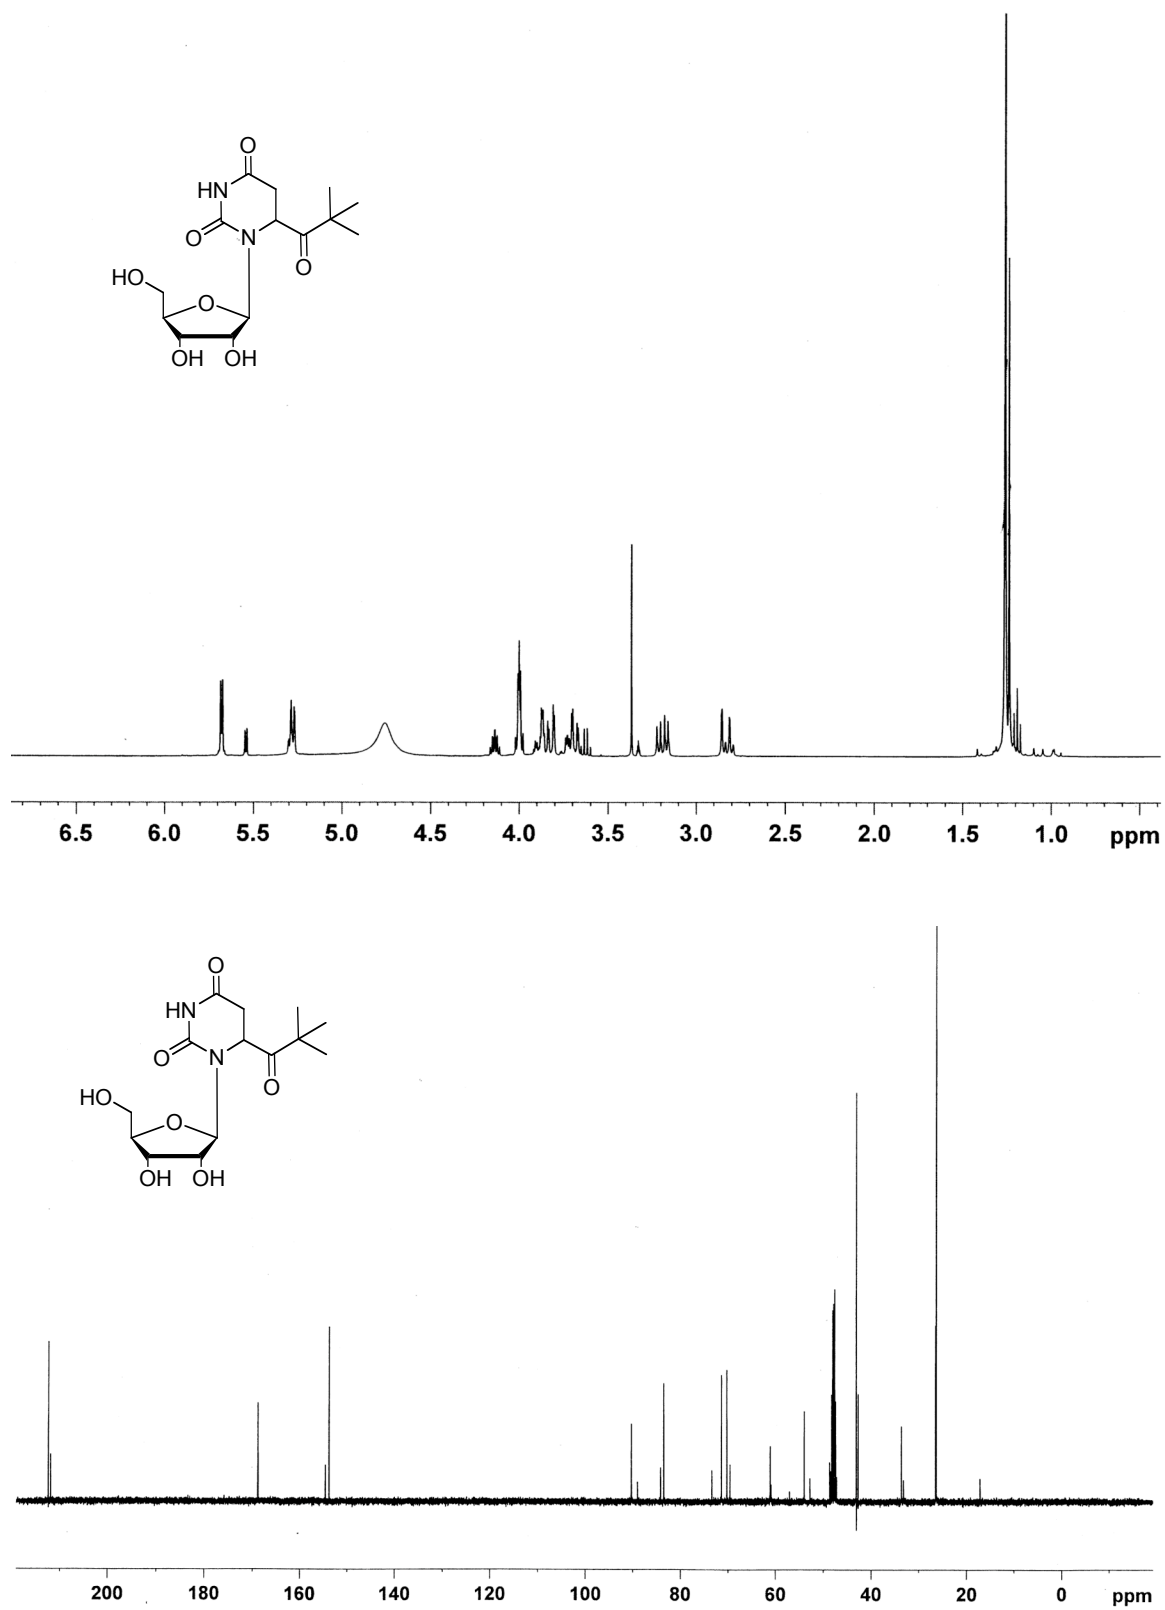

Supporting Information Figure 1. <sup>1</sup>H (top) and <sup>13</sup>C (bottom) NMR spectra of 2a.

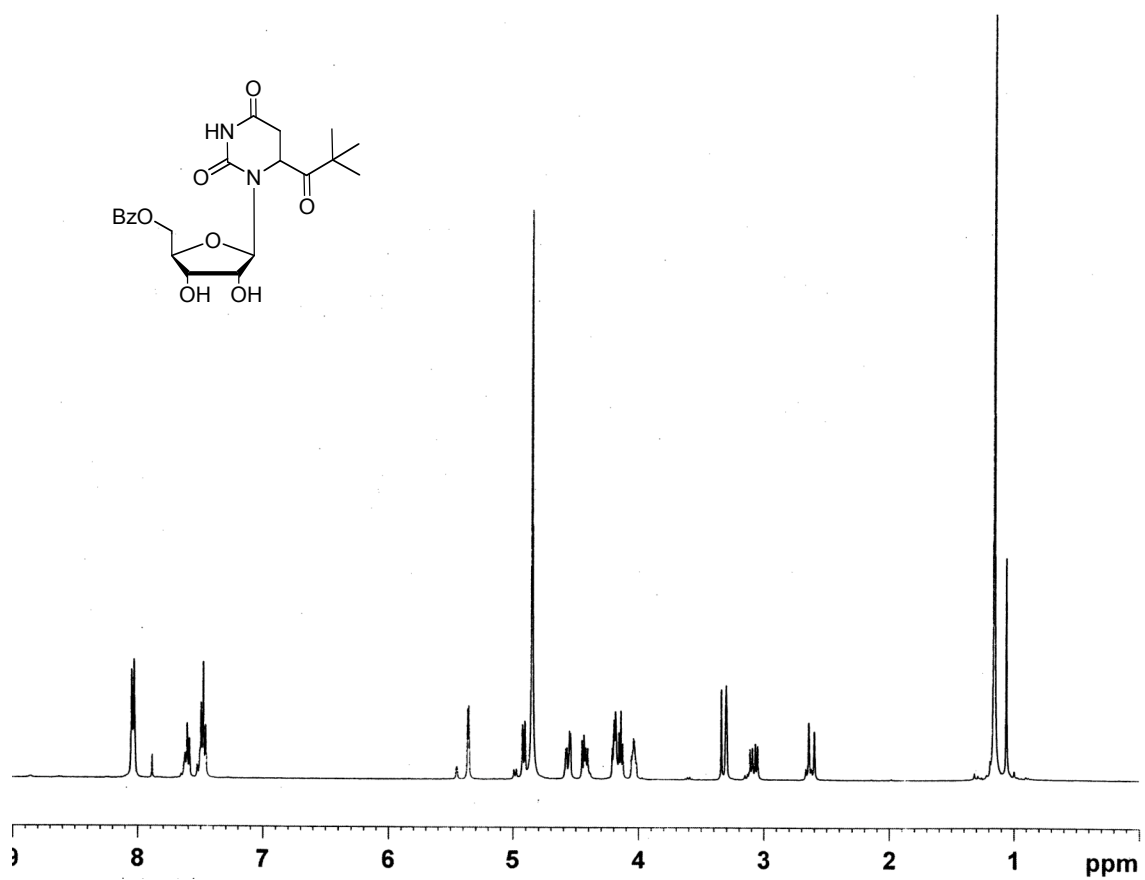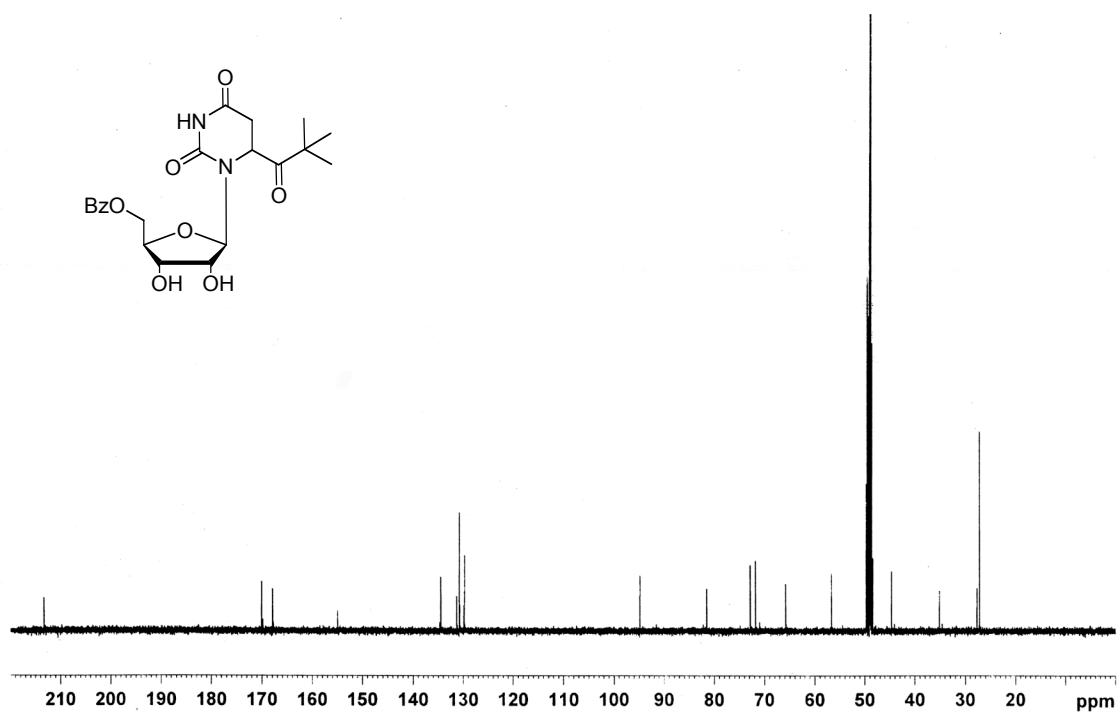

Supporting Information Figure 2. <sup>1</sup>H (top) and <sup>13</sup>C (bottom) NMR spectra of 2b.

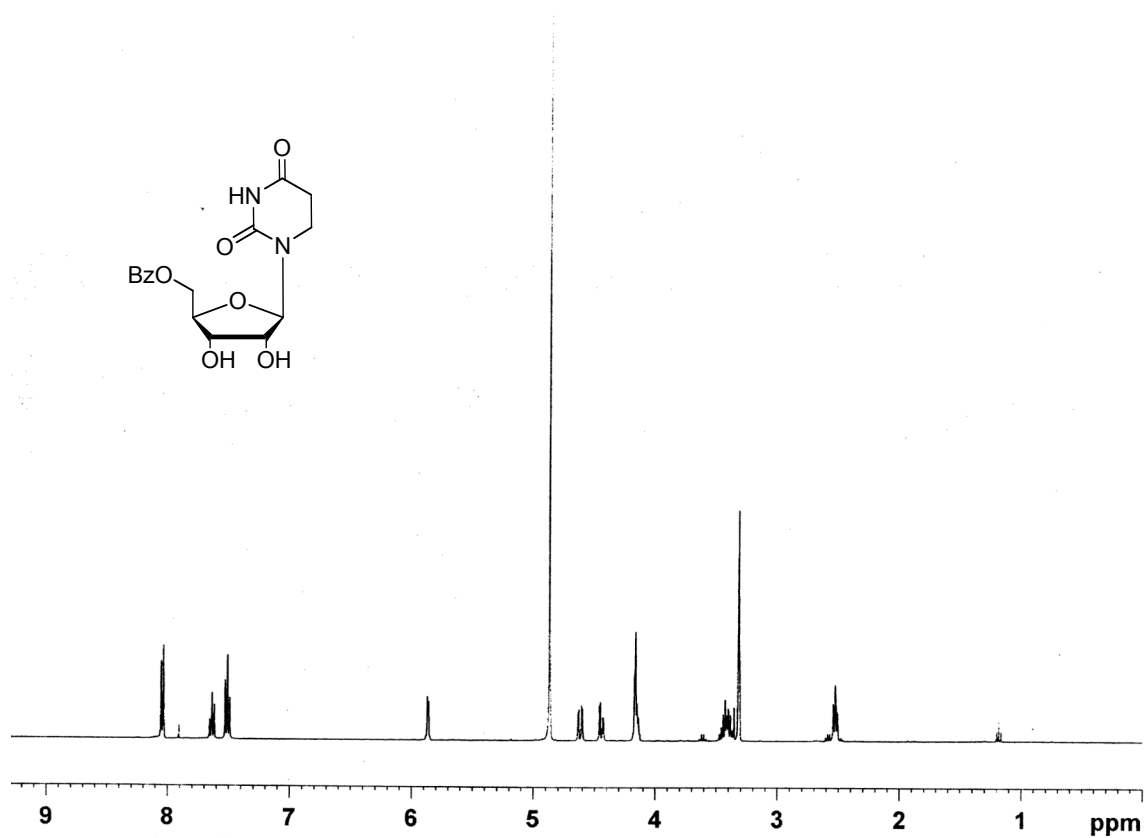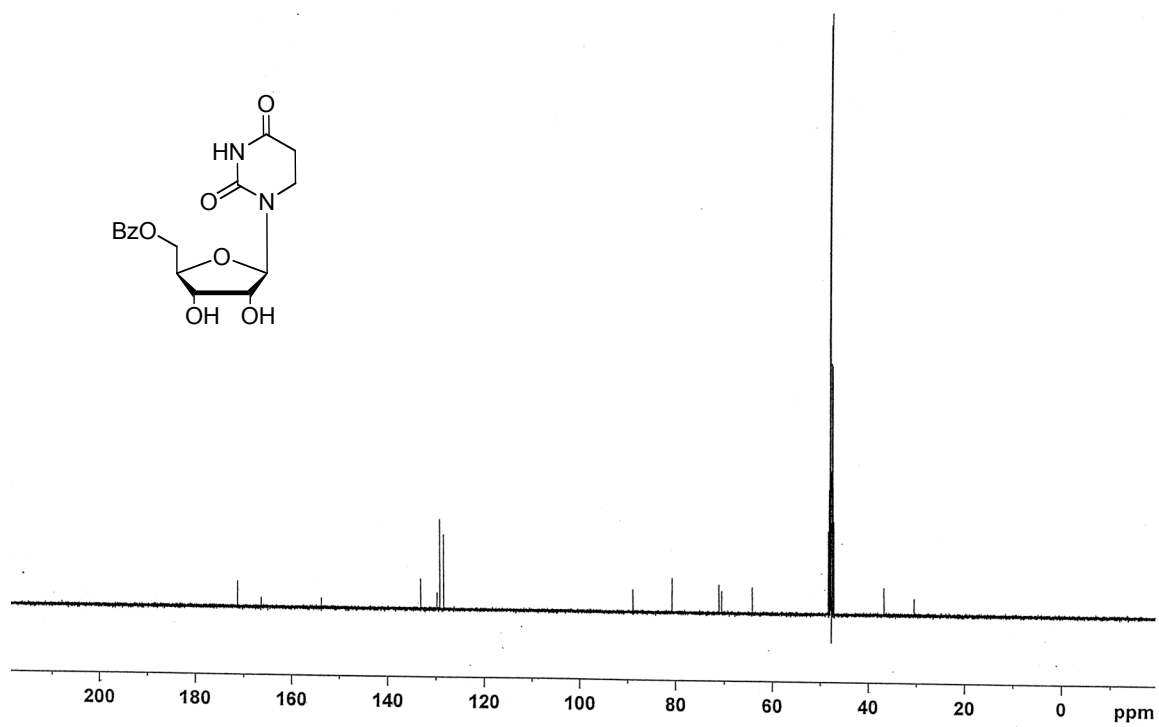

Supporting Information Figure 3.  $^1\text{H}$  (top) and  $^{13}\text{C}$  (bottom) NMR spectra of 4.

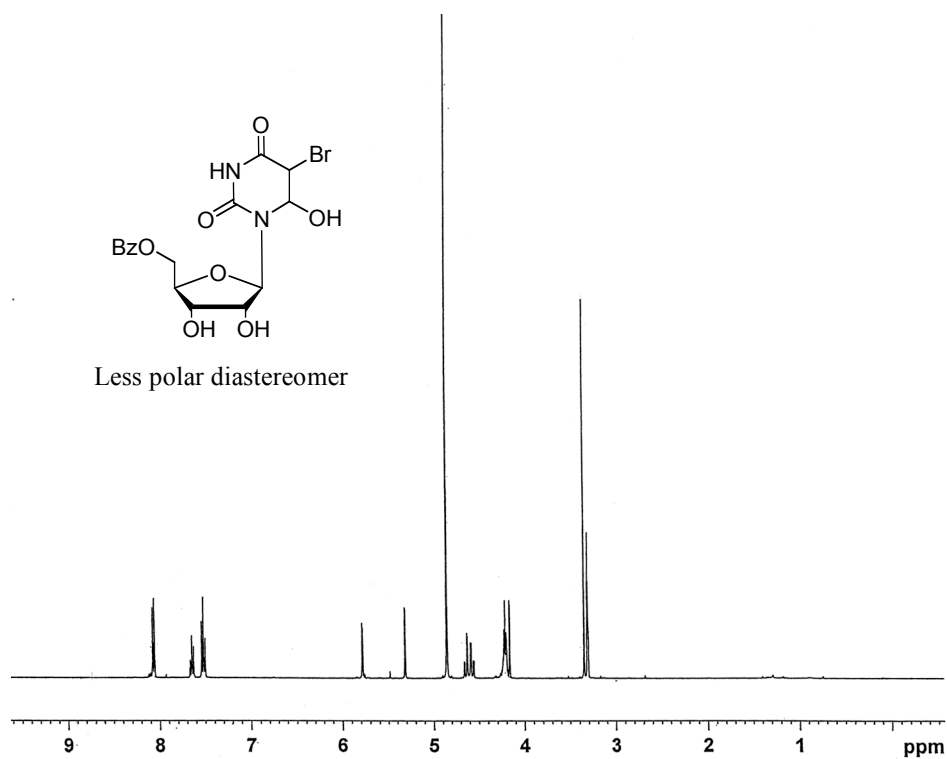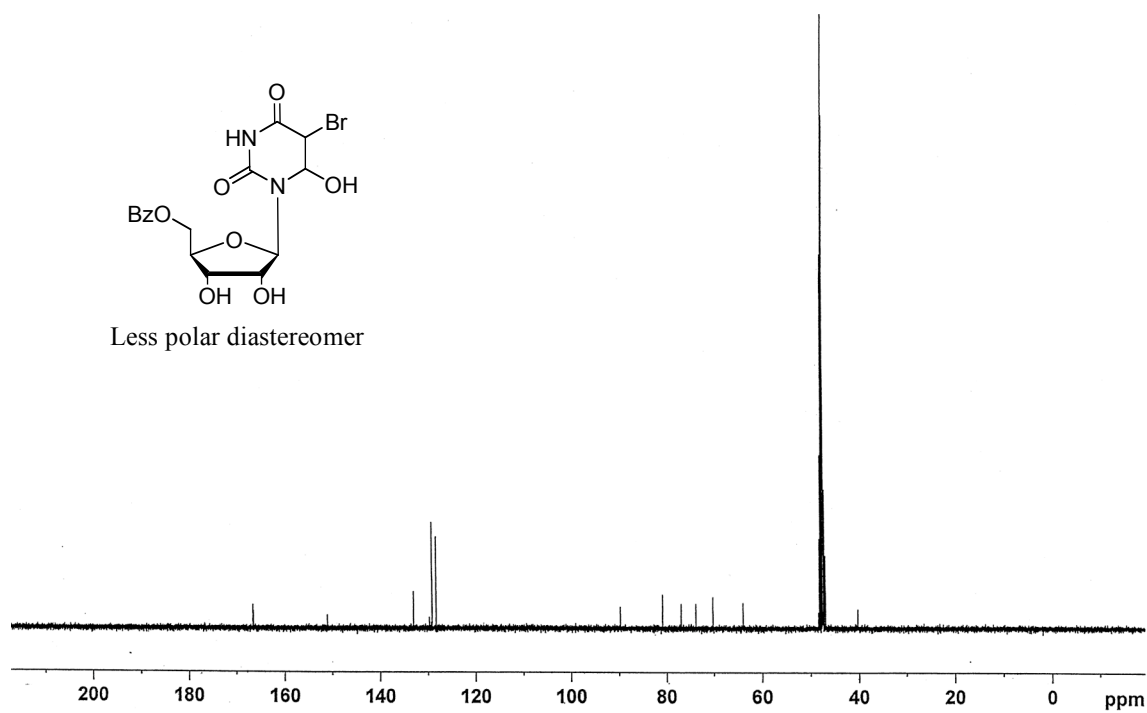

**Supporting Information Figure 4.** <sup>1</sup>H (top) and <sup>13</sup>C (bottom) NMR spectra of less polar bromohydrin.

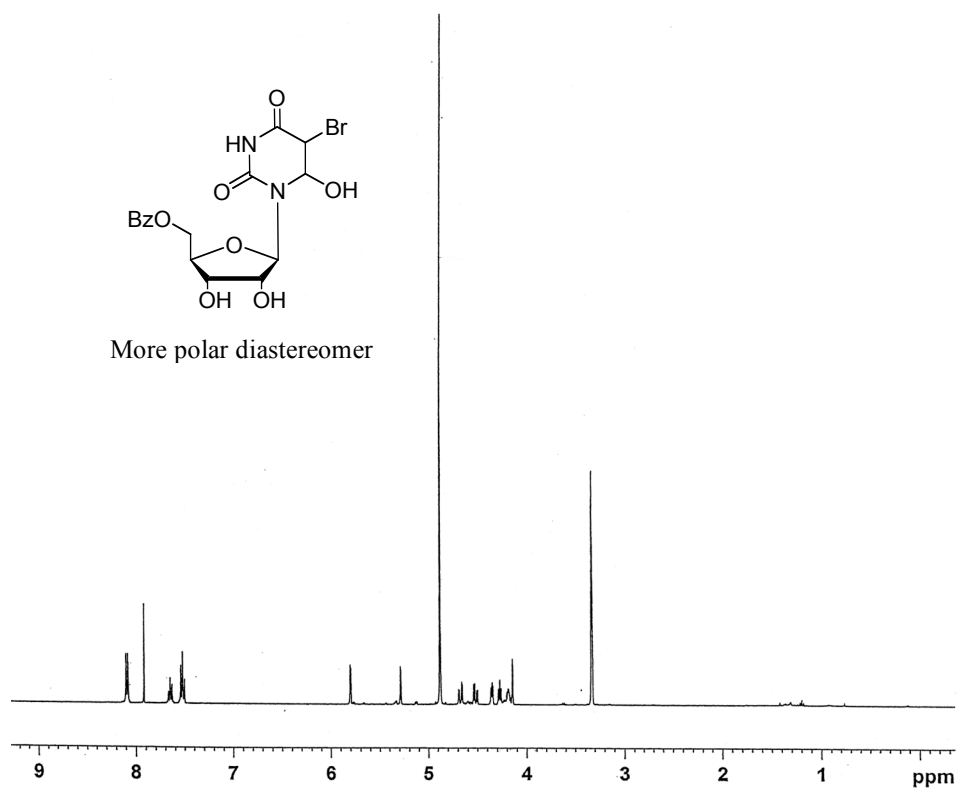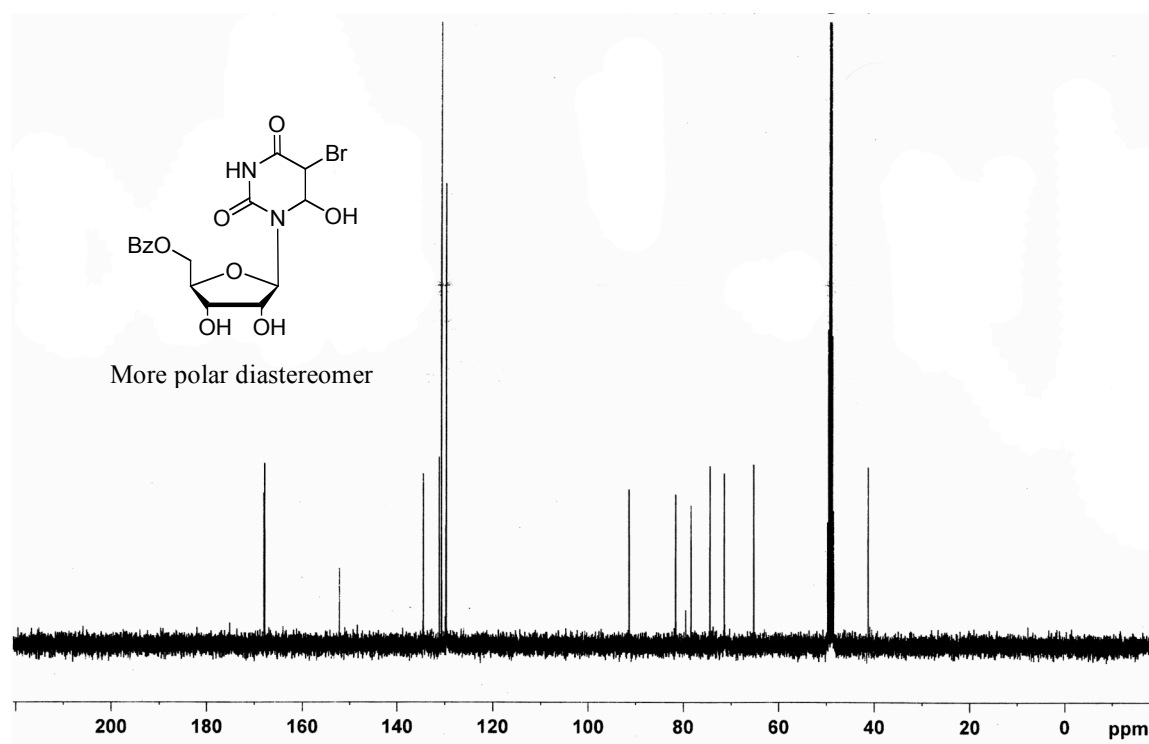

**Supporting Information Figure 5.**  $^1\text{H}$  (top) and  $^{13}\text{C}$  (bottom) NMR spectra of more polar bromohydrin.

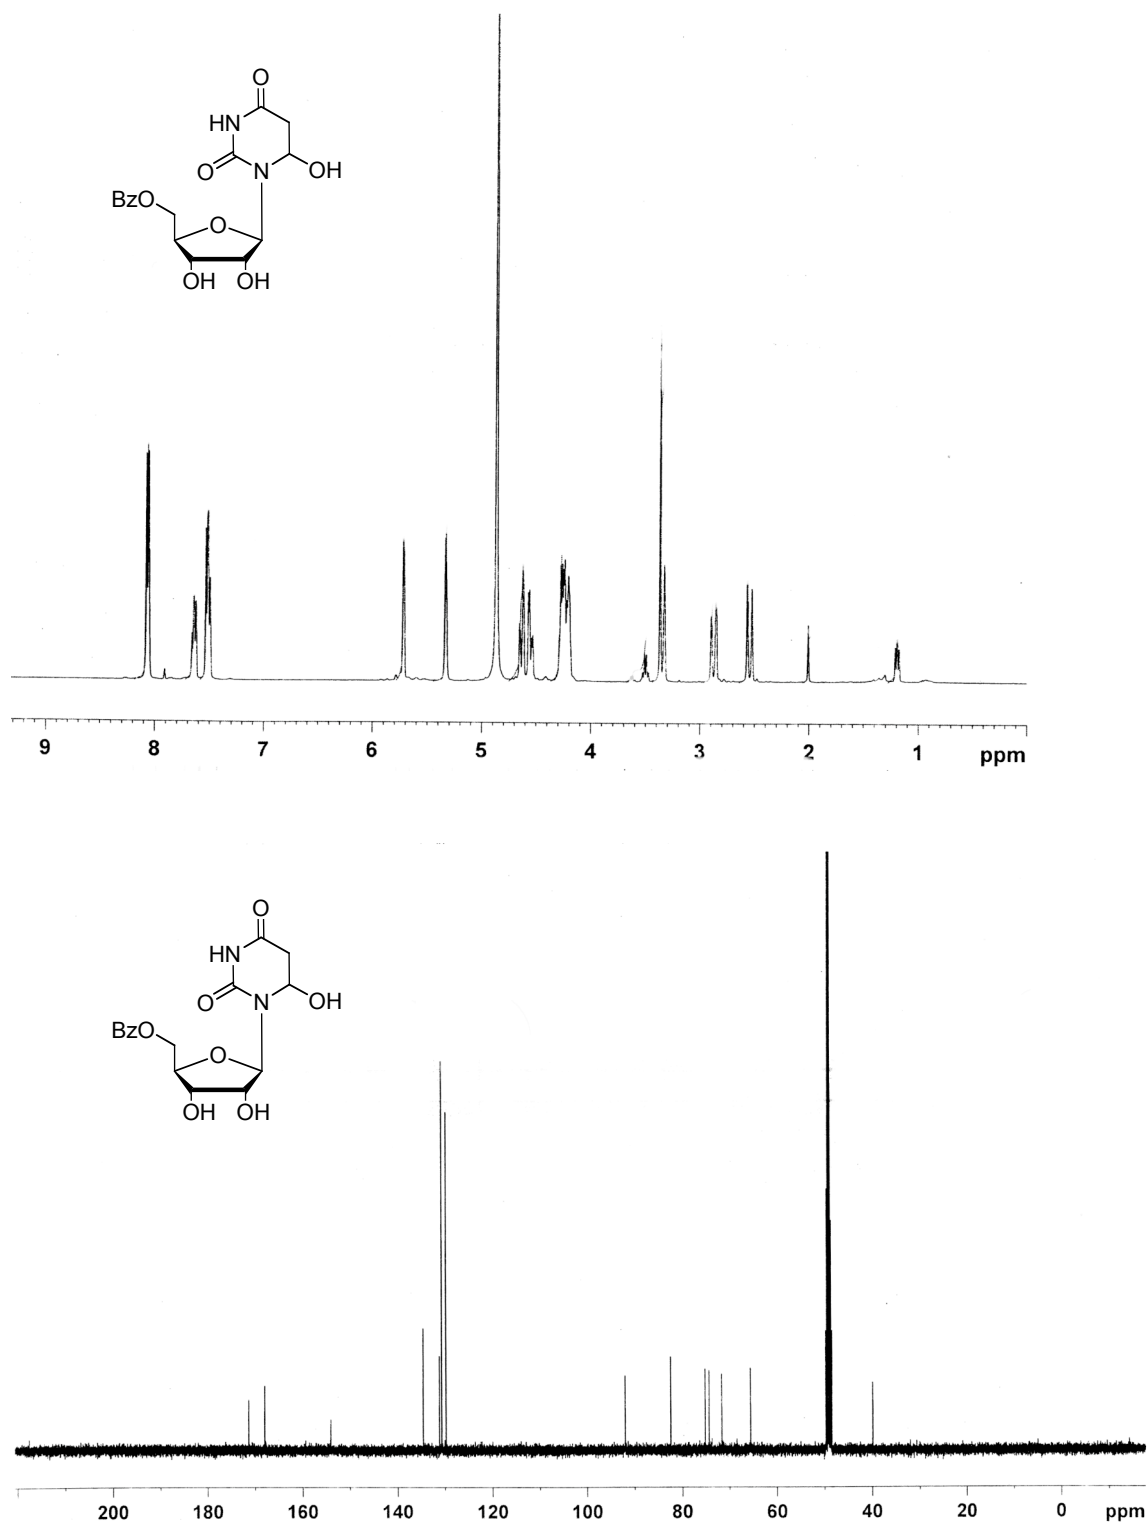

**Supporting Information Figure 6.**  $^1\text{H}$  (top) and  $^{13}\text{C}$  (bottom) NMR spectra of 6.



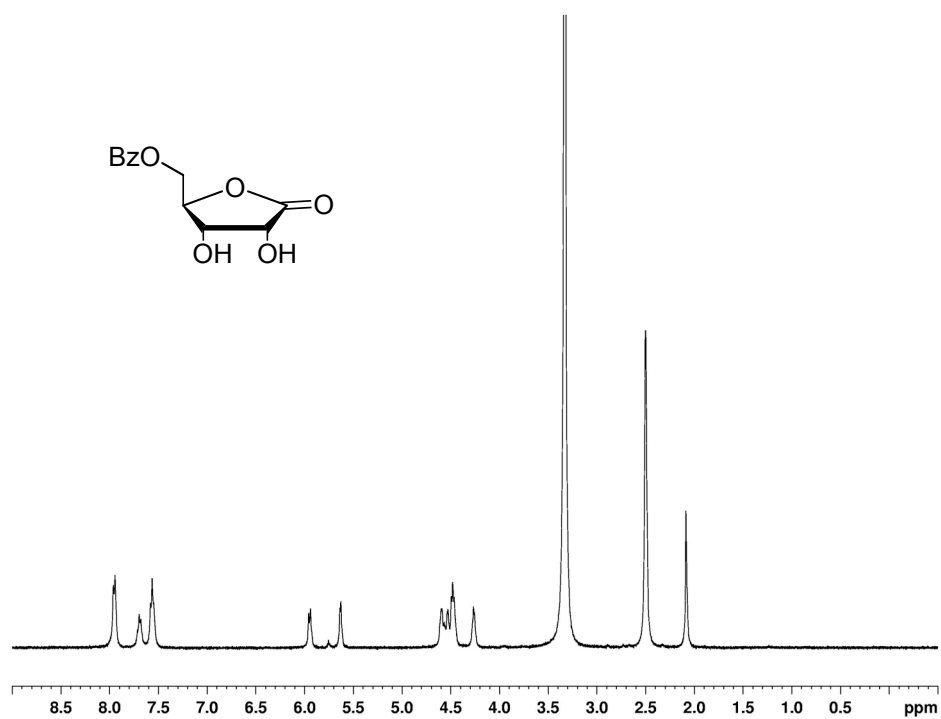

**Supporting Information Figure 7.**  $^1\text{H}$  NMR spectra of **7** ( $\text{d}_6\text{-DMSO}$ ).
